# Supplementary material for: Nylon-6-Coated Doxorubicin-Loaded Magnetic Nanoparticles and Nanocapsules for Cancer Treatment
Source: MDPI journal article supplement (doi:10.3390/magnetochemistry9040106), 2023-04-12
Supplement: s1 [file s1]

# Nylon-6-Coated Doxorubicin-loaded Magnetic Nanoparticles and Nanocapsules for Cancer Treatment

Ekaterina Kovrigina <sup>1</sup>, Yuliya Poletaeva <sup>1</sup>, Yanfang Zheng <sup>2</sup>, Alexey Chubarov <sup>1,\*</sup>  
and Elena Dmitrienko <sup>1,\*</sup>

<sup>1</sup> Institute of Chemical Biology and Fundamental Medicine SB RAS, 630090 Novosibirsk, Russia

<sup>2</sup> Affiliated Cancer Hospital & Institute of Guangzhou Medical University, Guangzhou 510095, China

\* Correspondence: chubarov@niboch.nsc.ru or chubarovalesha@mail.ru (A.C.); elenad@niboch.nsc.ru (E.D.);  
Tel.: +7-913-763-1420 (A.C.); +7-913-904-17-42 (E.D.)

## *Cytotoxicity Assay*

Tumor cell lines A549 and HEK 293FT were cultured in DMEM supplemented with 10% FBS, penicillin (100 units/mL), and streptomycin (100 µg/mL) in a humidified at 37.0 ± 1.0 °C, 5.0 ± 0.5 % CO<sub>2</sub> incubator in a humid atmosphere. Briefly, exponentially growing cells were plated in a 96-well plate ( $2 \times 10^3 \pm 0.5 \times 10^3$  cells per well). After overnight incubation, the cells were treated with media containing MNCs or NCs and incubated for 72 h at 37.0 ± 1.0°C in an atmosphere of 5.0 ± 0.5 % CO<sub>2</sub>. The inhibition of cell proliferation was determined using a colorimetric assay based on the cleavage of MTT by mitochondrial dehydrogenases in viable cells, leading to a blue precipitate of formazan formation. Briefly, a 200 µL aliquot of MTT solution (0.25 mg/mL in DMEM) was added to each well, and the plates were incubated at 37 °C for 3 h. The medium was removed, and the formazan crystals were dissolved in 0.1 mL DMSO. The absorbance at 570 nm (peak) and 620 nm (baseline) was read using a microplate reader Multiscan EX (Thermo Electron Corporation, Waltham, MA, USA). Results were expressed as a percentage of the control values. All values in the present study are given as the mean ± standard deviation (SD) values, and all measurements were repeated not less than three times.

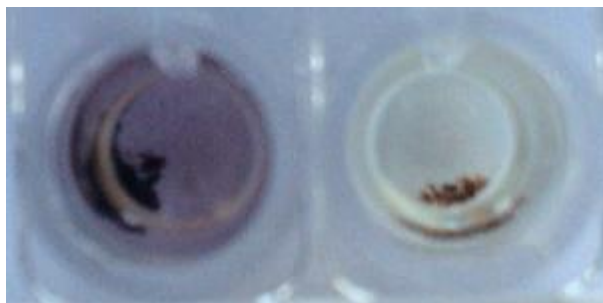

**Figure S1.** Scheme of the qualitative reaction of the nylon determination in MNP\_OA\_Ny (left) and MNP\_OA (right) with N-(2- hydroxyethyl)-phenazinium ion. The reaction product is colored blue-violet in the presence of nylon (with an amino group). The initial MNP\_OA was used as a control.

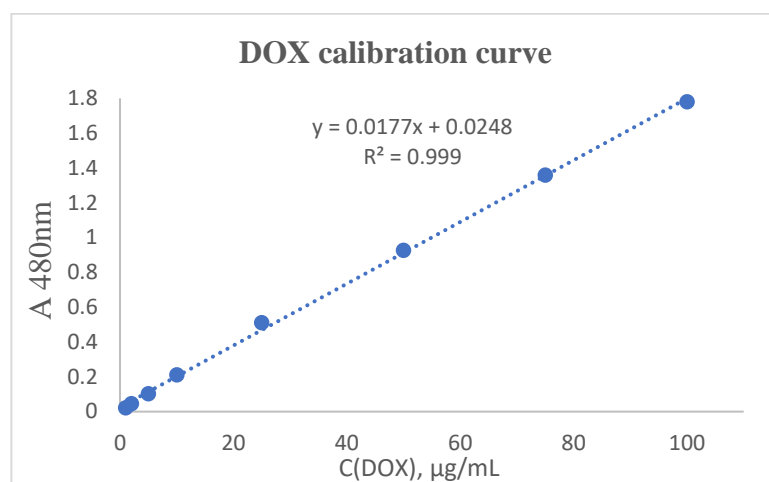

**Figure S2.** Doxorubicin calibration curve for concentration calculation for adsorption or release studies by UV-vis. spectroscopy ( $\lambda = 480 \text{ nm}$ ).

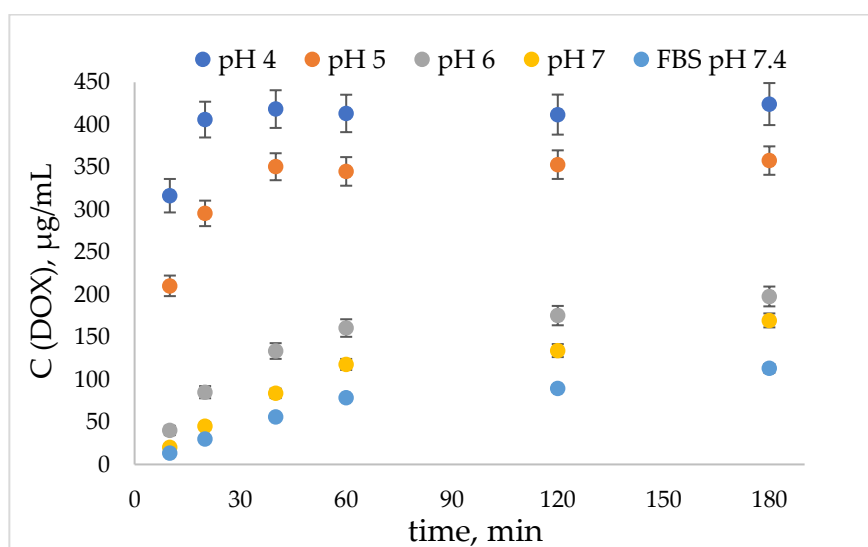

**Figure S3.** DOX-loaded NC2 time-dependent drug release at various pH.

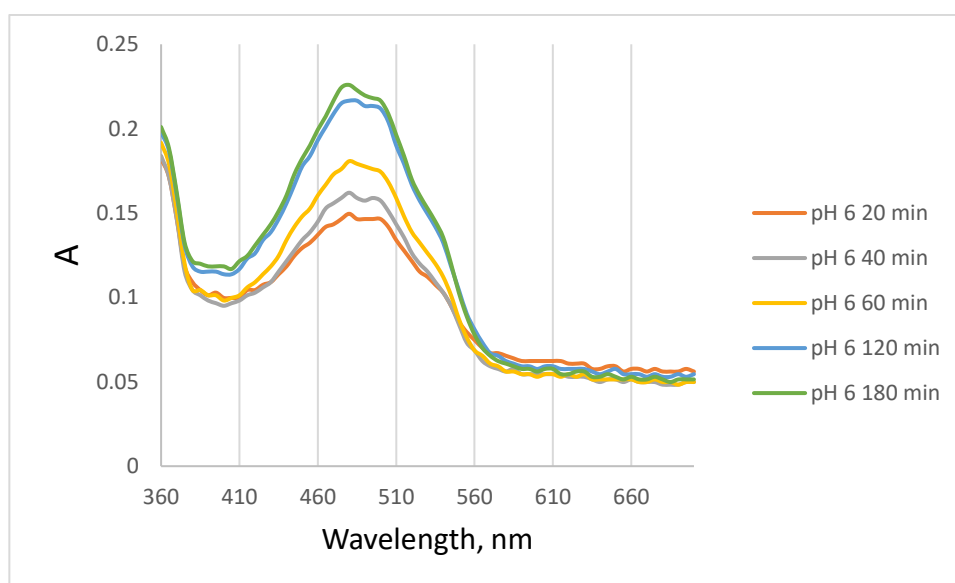

**Figure S4.** UV-vis spectra of aliquots in DOX-loaded NC2 time-dependent drug release experiment at pH 6.
